# Supplementary material
Source: PubMed Central journal article supplement (PMC2648095)
Supplement: tpc.108.063131_1.pdf [file tpc.108.063131_1.pdf]

**SI Fig 1. Lutein levels increase during plant development in *ccr1*.**

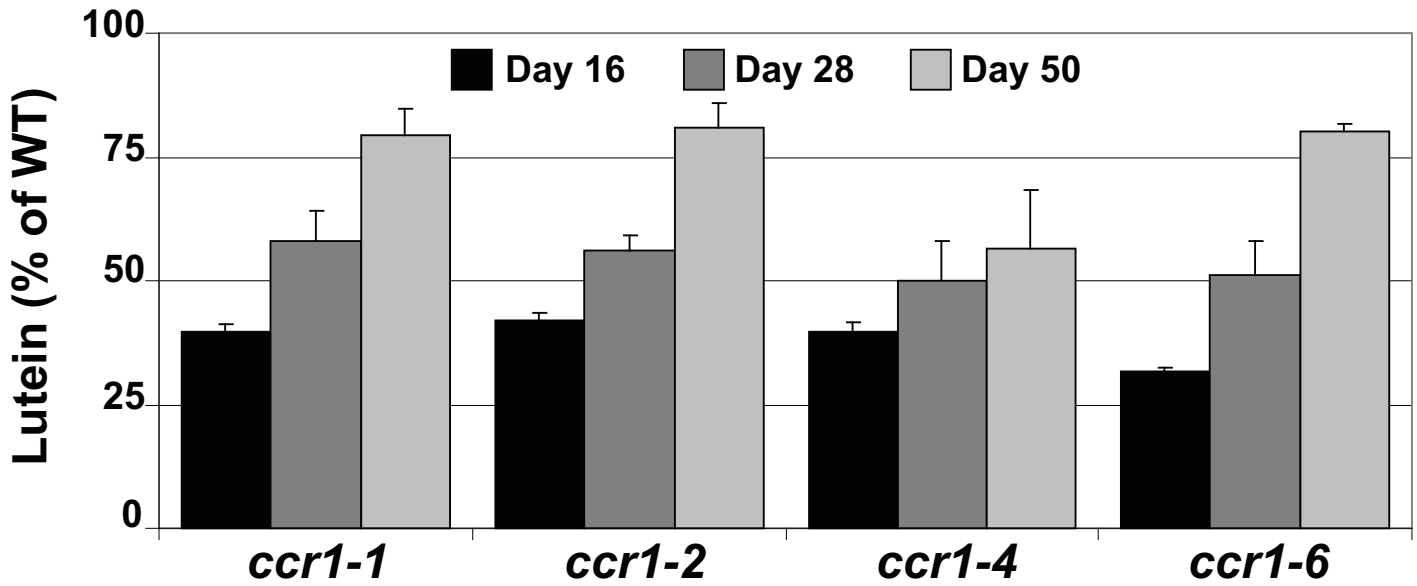

Lutein accumulation in aging leaf tissues from *ccr1* alleles. Lutein levels are expressed as a percentage of the total carotenoid pool relative to WT. Data are the average and standard errors (SE) of 2-5 biological replicates.

**SI Fig 2. Photosynthetic parameters of *ccr1* are consistent with reduced lutein content.**

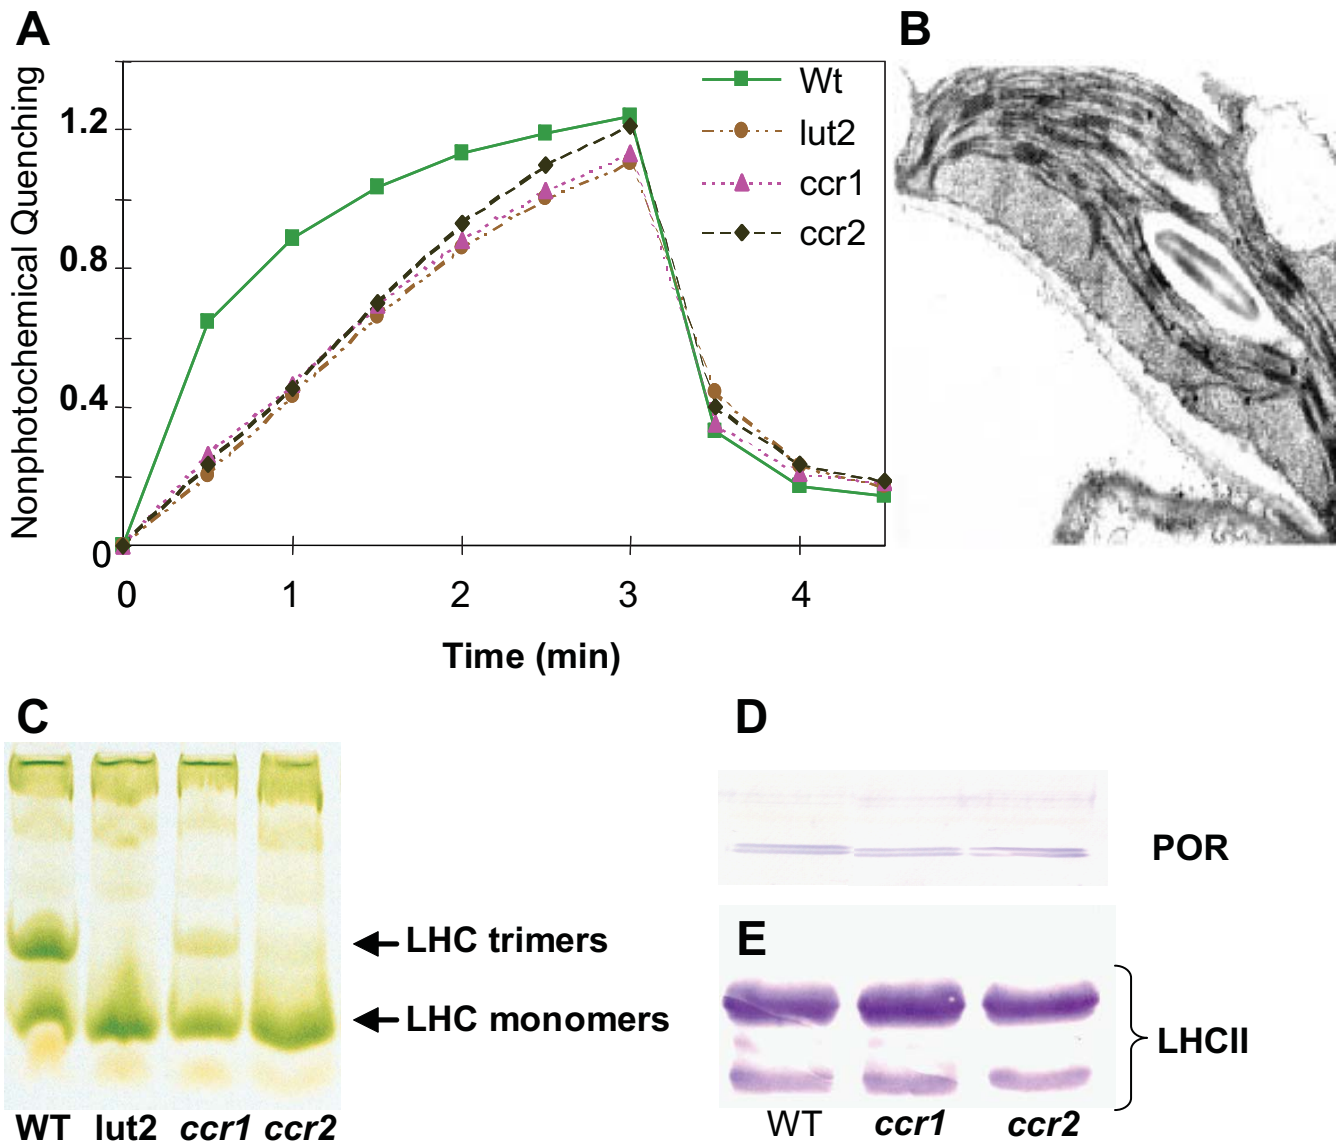

(A) Nonphotochemical quenching. Mature leaves were exposed to actinic light for 3 minutes, after which it was switched off and NPQ was calculated as  $(F_m - F_m')/F_m'$ . (B) Electron micrograph of *ccr1* chloroplast exhibits normal morphology. A native green gel (C) shows fewer LHC trimers in, *lut2*, *ccr1* and *ccr2* compared to WT. Representative immunoblots of POR (D) and LHCII (E) shows that protein levels were identical in tissue from etiolated (POR) and light-grown leaf tissue (LHCII) in wild type, *ccr1*, and *ccr2*.

**SI Fig 3. Inhibition of carotenoid biosynthesis affects shoot branching in pea.**

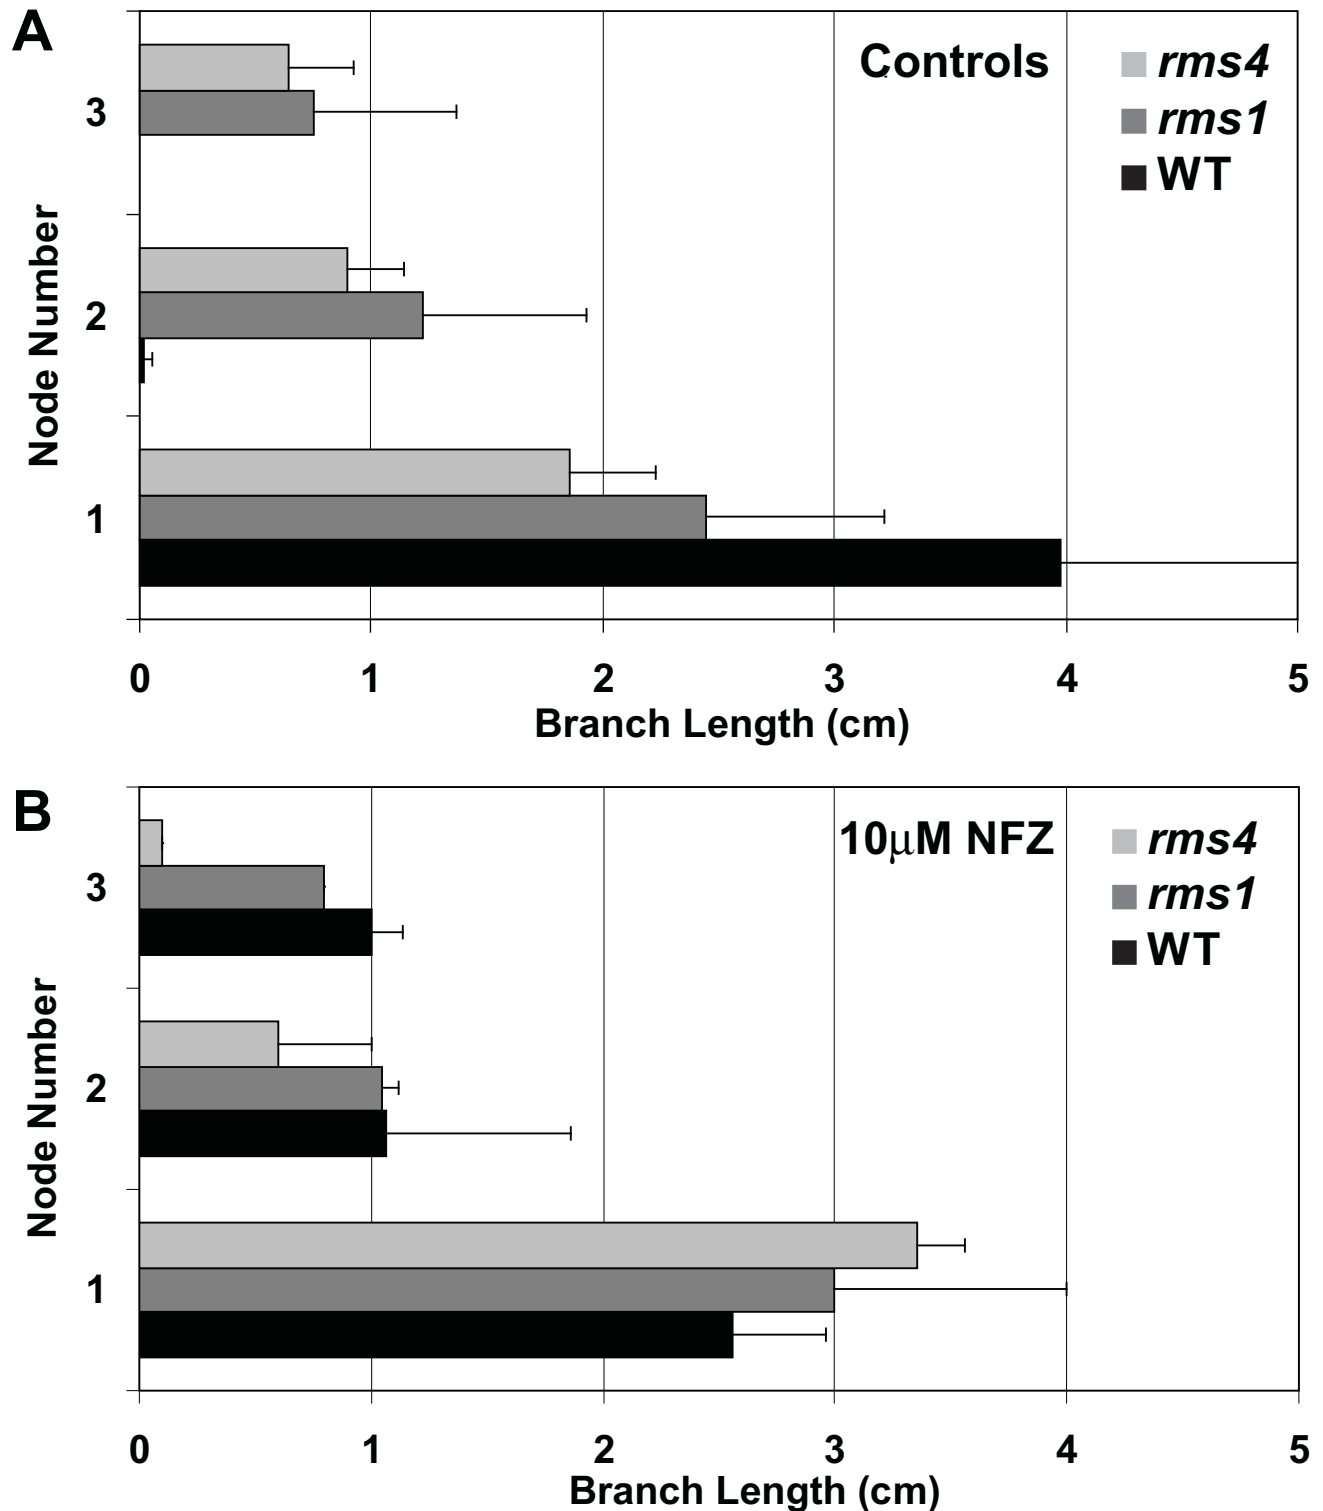

Plants were grown on (A) MSO media alone or (B) 10 $\mu$ M norflurazon. The length of the branches developed at each shoot node, numbered from the shoot base, was determined after 12 days. The length of the shoot branch serves as an indication of bud outgrowth from the node. The average and SE of three to eight plants are given.

**SI Table 1. Pigment Content and Photosynthetic Parameters**

|               | Chloroplasts |                 |                  |                             | Etioplasts          |
|---------------|--------------|-----------------|------------------|-----------------------------|---------------------|
|               | $F_v/F_m^a$  | $\Phi_{PSII}^a$ | Chl <sup>b</sup> | Chl <i>a/b</i> <sup>b</sup> | PChlde <sup>b</sup> |
| Wt            | 0.738±.004   | 0.425±.019      | 1210±70          | 3.30±0.1                    | 1.15                |
| <i>ccr1.1</i> | 0.726±.002   | 0.433±.019      | 1040±90          | 3.26±0.1                    | 0.77                |
| <i>ccr2.1</i> | 0.714±.006   | 0.448±.011      | 1150±60          | 3.27±0.2                    | 0.88                |

Averages and standard deviations for 3 plants are given. <sup>a</sup>Abbreviations:

$F_v/F_m$ , maximum photosynthetic efficiency  $\Phi_{PSII}$ , photosynthetic efficiency of PSII. <sup>b</sup>Chl, chlorophyll ( $\mu\text{g/g}$  frsh wght) of six week old leaves, PChlde ratio, ratio of inactive and active forms of protochlorophyllide in etioplasts (Park et al. 2002).

SI Table 2. Quantitative PCR Primers

| Target                                                     | Target Name                      | Mutant      | Accession Number | Sequence (5'-->3')                                                    | Direction                     | Amplicon Size (bp) |
|------------------------------------------------------------|----------------------------------|-------------|------------------|-----------------------------------------------------------------------|-------------------------------|--------------------|
| <b>Cyclo</b>                                               | Cyclophilin                      | -           | At2g29960        | TCTTCCTCTTCGGAGCCATA                                                  | Forward                       | 250                |
| <b>PP2</b>                                                 | Protein Phosphatase 2A           | -           | At1g13320        | AAGCTGGGAATGATTCGATG<br>CTTCGTGCAGTATCGCTTCTC<br>ATTGGAGAGCTTGATTTGCG | Reverse<br>Reverse<br>Forward | 249                |
| <b>Carotenoid Biosynthesis</b>                             |                                  |             |                  |                                                                       |                               |                    |
| <b>PSY</b>                                                 | Phytoene synthase                |             | At5g17230        | TGGGAGTTTGATTCTTCTAACTGTA                                             | Forward                       | 251                |
| <b>PDS</b>                                                 | Phytoene desaturase              |             | At4g14210        | GGTATCTGCTTCTTCTTACCTTTGT                                             | Reverse                       |                    |
| <b>ZDS</b>                                                 | Carotene desaturase              |             | At3g04870        | GATCACCTACTCTTTAGCAGAAGTAA                                            | Forward                       | 334                |
| <b>CRTISO</b>                                              | Carotenoid isomerase             | <i>ccr2</i> | At1g06820        | GTACACAGATCTTGGAGTCTTAAC                                              | Reverse                       |                    |
| <b>εLCY</b>                                                | ε-lycopene cyclase               | <i>lut2</i> | At5g57030        | TTATGCTCTAGGTTTCATAGACTGC                                             | Forward                       | 248                |
| <b>βLCY</b>                                                | β-lycopene cyclase               |             | At3g10230        | CTAGTCCAGTGACATAAGTTTCTCC                                             | Reverse                       |                    |
| <b>εOH1</b>                                                | ε-hydroxylase I                  | <i>lut1</i> | At3g53130        | GAAAAGGAAGGGATCCTTGG                                                  | Forward                       | 256                |
| <b>βOH1</b>                                                | β-hydroxylase I                  |             | At4g25700        | GCAAAGCATTGACTGTGCTC                                                  | Reverse                       |                    |
| <b>βOH2</b>                                                | β-hydroxylase II                 |             | At5g52570        | TCGGTTTGTGTAGTGTGAGAGC                                                | Forward                       | 253                |
|                                                            |                                  |             |                  | AAGGCTAAACCAGCAGGACC                                                  | Reverse                       |                    |
|                                                            |                                  |             |                  | CTTGTTTCTAGTATGACAAACCTTAC                                            | Forward                       | 245                |
|                                                            |                                  |             |                  | GACCAGGTCTAGCAACTAAAGAAGT                                             | Reverse                       |                    |
|                                                            |                                  |             |                  | ATGCAGAAGACGGAAGTGCT                                                  | Forward                       | 240                |
|                                                            |                                  |             |                  | CAGCCTTTTCAGCTTTTCACC                                                 | Reverse                       |                    |
|                                                            |                                  |             |                  | TCTTCGATTTAAACGCTTTTCTG                                               | Forward                       | 115                |
|                                                            |                                  |             |                  | AGCGTCTATAGCGTTTGTGGA                                                 | Reverse                       |                    |
|                                                            |                                  |             |                  | GCAAACCACCCTATATCCAC                                                  | Forward                       | 178                |
|                                                            |                                  |             |                  | GCGACGTCATCAAGATCTCA                                                  | Reverse                       |                    |
| <b>Novel Branching Hormone Perception and Biosynthesis</b> |                                  |             |                  |                                                                       |                               |                    |
| <b>CCD1</b>                                                | Carotenoid cleavage dioxygenases |             | At3g63520        | GCTCCCATCCGTGATGAAAC                                                  | Forward                       | 248                |
| <b>CCD4</b>                                                | Carotenoid cleavage dioxygenases |             | At4g19170        | TTGGCAGCTCCGAAGAACTC                                                  | Reverse                       |                    |
| <b>CCD7</b>                                                | Carotenoid cleavage dioxygenases | <i>max3</i> | At2g44990        | TACGCGGCGATTGGAGATCC                                                  | Forward                       | 250                |
| <b>CCD8</b>                                                | Carotenoid cleavage dioxygenases | <i>max4</i> | At4g32810        | GCGATTTAGCGTCCATCACC                                                  | Reverse                       |                    |
| <b>MAX1</b>                                                | More Auxillary 1                 | <i>max1</i> | At2g26170        | ACTCAAACCTCGTCCGTAATTG                                                | Reverse                       | 258                |
|                                                            |                                  |             |                  | CCCATAAACCATGAAAACCC                                                  | Forward                       |                    |
|                                                            |                                  |             |                  | TGCTCAACGACCTTGTAACCTC                                                | Reverse                       | 243                |
|                                                            |                                  |             |                  | TAGGGAAACTTGGCTCTTGC                                                  | Forward                       |                    |
|                                                            |                                  |             |                  | TCGATCAGGTCATTAAGAGGC                                                 | Forward                       | 249                |
|                                                            |                                  |             |                  | TACCGAATGGGATGAAAGCG                                                  | Reverse                       |                    |

| <b>Histone Modification of Chromatin Surrounding CRTISO</b> |                                   |  |           |                                                 |                    |     |
|-------------------------------------------------------------|-----------------------------------|--|-----------|-------------------------------------------------|--------------------|-----|
| <b>SAM</b>                                                  | S-adenosyl methionine transferase |  | At4g01850 | TGAAGTCCAAAAGCAAAAACC<br>GACGGAGAAGAAGAGCGAAA   | Forward<br>Reverse | 197 |
| <b>CH2</b>                                                  | CRTiso promoter 2                 |  | AT1g06820 | GATTGACCATAACAGTGGATCG<br>CTCGACACTATCCTTGGATTG | Forward<br>Reverse | 209 |
| <b>CH1</b>                                                  | CRTiso promoter 1                 |  | AT1g06820 | ACAAAGATGCGGTCTCAACG<br>CCCAACCAAGTTGGAATAGCT   | Forward<br>Reverse | 216 |
| <b>CH3</b>                                                  | CRTiso exon 1                     |  | AT1g06820 | GTGTTTTCAAATCCCGTAAAG<br>CCATCTCTTTCGTCCCTTG    | Forward<br>Reverse | 210 |
| <b>CH4</b>                                                  | CRTiso exon 2                     |  | AT1g06820 | CTTAATTTGAAGGGAACAGGGG<br>ATCCCTTCCTTTTCGTGAGG  | Forward<br>Reverse | 198 |
| <b>Genes Neighbouring CRTISO</b>                            |                                   |  |           |                                                 |                    |     |
| <b>SAM</b>                                                  | S-adenosyl-methione               |  | At4g01850 | GACGGAGAAGAAGAGCGAAA<br>TGAAGTCCAAAAGCAAAAACC   | Forward<br>Reverse | 197 |
| <b>6800</b>                                                 | Lipase III                        |  | At1g06800 | GTTGAGAGTGGTGAACGAGCAC<br>GTCCTTTCCCATGATACCCG  | Forward<br>Reverse | 242 |
| <b>6810</b>                                                 | Unknown                           |  | At1g06810 | TAGGCTACAATGGTCCTGTCAC<br>TTATCAACGCCTTGACCAGC  | Forward<br>Reverse | 229 |
| <b>6830</b>                                                 | Glutaredoxin                      |  | At1g06830 | GCTCCTGTTGTTTGTCTATGC<br>ATGGCTTCACTAGGGGAACG   | Forward<br>Reverse | 234 |
| <b>6840</b>                                                 | Kinase                            |  | At1g06840 | CATGGCAAGAACATTGTGCG<br>AGATCCGCTGTCTTGGCTAC    | Forward<br>Reverse | 239 |
| <b>Auxin Transport</b>                                      |                                   |  |           |                                                 |                    |     |
| <b>PIN1</b>                                                 | Auxin Transporter 1               |  | At1g73590 | CCAGTTTATTCGGCATCACC<br>ACGGCATAAGAAGCAACGAG    | Forward<br>Reverse | 244 |
| <b>PIN6</b>                                                 | Auxin Transporter 6               |  | At1g77110 | TGGGCCGTTTTCTTCAAAGC<br>GATTGATCCGGCTGCTTGAC    | Forward<br>Reverse | 255 |

**Supplemental Table 3.** Microarray analysis of *ccr1-1*

This table can be downloaded as a separate file in spreadsheet format.

**SI Table 4. SDG8 /CCR1 /EFS Sequencing Primers**

| Foward     |                          | Reverse    |                         | SIZE |
|------------|--------------------------|------------|-------------------------|------|
| Name       | Sequence                 | Name       | Sequence                |      |
| EFS_Amp1F  | TTTTTGGGGTCTCTGTTTGG     | EFS_Amp1R  | CACTCCCTGCTCCTGAGTGT    | 511  |
| EFS_Amp2F  | GATTGAGCAGATGGGATACGG    | EFS_Amp2R  | GTGGCGCTACAGCCAAATAC    | 570  |
| EFS_Amp3F  | GGAAGAAATGGACCATCGAG     | EFS_Amp3R  | AATAGGGGAATTGGCTTCCA    | 489  |
| EFS_Amp4F  | TGGTATGGCTGCTGATCTGA     | EFS_Amp4R  | AATCCCCACTCAGATGAACG    | 447  |
| EFS_Amp5F  | GCTCGCCATCTGAGAAAATC     | EFS_Amp5R  | AAAGGTGTGGGTCATCATCTAAA | 605  |
| EFS_Amp6F  | AGAATTGCCAGGATCAGCAC     | EFS_Amp6R  | GCAGATTCGGAAAACCTTGGA   | 534  |
| EFS_Amp7F  | GATGAATTGCGTGCTTCAAA     | EFS_Amp7R  | CCAGGCACTCTCTGTGGAAT    | 574  |
| EFS_Amp8F  | GGTGCCCTTCTAGATGCTGA     | EFS_Amp8R  | CGCAACACACTGGAAAACGT    | 517  |
| EFS_Amp9F  | GGCCACACACTGTTCTGGCTA    | EFS_Amp9R  | ACCTGTCAAACGCTTGCTCT    | 537  |
| EFS_Amp10F | GAGTTGGGCATAGGACAGGA     | EFS_Amp10R | TCGCTTGCAAACAAGACATT    | 578  |
| EFS_Amp11F | CGTGTTCCTTCTATTTTGG      | EFS_Amp11R | TCCACACAGCTTTAAACAGCA   | 671  |
| EFS_Amp12F | TGCTTTCAAGGGTCAGAAACA    | EFS_Amp12R | GGGGAAAATTTCAACCGAGT    | 598  |
| EFS_Amp13F | AAAAGCTTATGAGGGTTTTGGACA | EFS_Amp13R | ACCCTGTGAACGAACCAGAC    | 618  |
| EFS_Amp14F | TGCAGTGGATGGTGAATGG      | EFS_Amp14R | GCTGAAGAAGAGGTGGAGGA    | 498  |
| EFS_Amp15F | GAGCAAATGCCACAGAGCTT     | EFS_Amp15R | CTGCAAAAATTGGTGGTGCTA   | 567  |
| EFS_Amp16F | AACAGCAGCCCATCAAATCT     | EFS_Amp16R | AGGAATTCAGGCACAGGATGC   | 583  |
| EFS_Amp17F | CAAACAGGATTCAGCAAAAGG    | EFS_Amp17R | GGAAGTGCCTATGGGTTTGA    | 577  |
| EFS_Amp18F | CAGAACACACTTGGCATTGG     | EFS_Amp18R | ATTTTTGGAGCCAGGTGACA    | 503  |
| EFS_Amp19F | AGTTGTTGAAATTTGGCTGTCT   | EFS_Amp19R | TTTCAGGAGTTGCAGCCTTT    | 573  |
| EFS_Amp20F | TTAGAAAACCTTGGCGCATC     | EFS_Amp20R | CATGAGACACTGGCGGTAGA    | 555  |
| EFS_Amp21F | CCGCAACAAAAGTTCCTTTC     | EFS_Amp20R | CCTATGGGCCAAATAAACCA    | 532  |
